# Supplementary material for: Nlrp3 Inflammasome Genetic Variants Are Associated With Risk And/Or Protection To Hospitalization Among Covid-19 Patients From Rio De Janeiro, Brazil
Source: Research Square preprint supplement (doi:10.21203/rs.3.rs-1050492/v1), 2021-11-22
Supplement: Supplementary file 1 [file a23612512da73f65e06ee8e3.docx]

### Supplementary material

| Gene | SNP | Chromosome | Position |  | Ancestral allele | Variation allele |
| --- | --- | --- | --- | --- | --- | --- |
| CARD8 | rs2043211 | 19 | 48234449 |  | A | T |
| CARD8 | rs6509365 | 19 | 48240212 |  | A | G |
| AIM2 | rs2276405 | 1 | 159073406 |  | C | T |
| IFI16 | rs1101996 | 1 | 159028236 |  | A | C |
| CASP1 | rs572687 | 11 | 105032992 |  | A | G |
| IL-1β | rs1143634 | 2 | 112832813 |  | G | A |
| NLRP3 | rs3806268 | 1 | 247424175 |  | A | G |
| NLRP3 | rs35829419 | 1 | 247425556 |  | A | C |
| NLRP3 | rs4612666 | 1 | 247435768 |  | C | T |
| NLRP3 | rs15390193 | 1 | 247436999 |  | A | C |
| NLRP3 | rs10754558 | 1 | 247448734 |  | C | G |

Table S1: Characteristics of inflammasome SNPs included in the study.

SNP: single nucleotide polymorphism; CARD8: Caspase Recruitment Domain-Containing Protein 8; AIM2: Absent In Melanoma 2; IFI16: Interferon Gamma Inducible Protein 16; CASP1: Caspase 1; IL-1β: Interleukin 1 Beta; NLRP3: NLR family Pyrin Domain Containing 3.
